# Supplementary material for: Beliefs, practices and knowledge of community pharmacists regarding complementary and alternative medicine: national cross-sectional study in Lebanon
Source: PubMed Central journal article supplement — BMJ Open. 2019 Mar 8;9(3):e025074. doi: 10.1136/bmjopen-2018-025074 (PMC6429928; doi:10.1136/bmjopen-2018-025074), 2019-03-08
Supplement: bmjopen-2018-025074supp001.pdf [file bmjopen-2018-025074supp001.pdf]

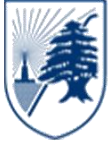

جامعة بيروت العربية  
BEIRUT ARAB UNIVERSITY

## Lebanese Pharmacist Knowledge and Attitudes towards Complementary and Alternative Medicine

Date (dd /mm/ yy): \_\_\_/\_\_\_/\_\_\_

Subject ID: \_\_\_\_\_

Interview date:

Interview time:

Interviewer name:

District of the Pharmacy:

- Beirut
- South
- North
- Mount Lebanon
- Beqaa
- Nabatieh

## Section A: Socio-demographics

Mark with an (X) for the suitable answer:

- Age range:
  - 20 – 30 years
  - 31 – 40 years
  - 41 – 50 years
  - Above 50 years
  
- Gender:
  - Male
  - Female
  
- Employment status
  - Full-time
  - Part-time
  
- Highest educational level attained:
  - Bachelors
  - Masters
  - Pharm D
  - Ph.D
  
- Which university did you graduate from: \_\_\_\_\_
  
- During your university education, did you receive any education/training on CAM-products?
  - Yes
  - No
  
- Did you receive any post graduate education/training on CAM-products?
  - Yes
  - No
  
- Years of work experience (in community pharmacy):
  - 1 – 3 years
  - 4 – 7 years
  - 8 – 10 years
  - Above 10 years

- How many pharmacists work in your pharmacy? \_\_\_\_\_
- How long has this pharmacy been opened for? \_\_\_\_\_

### Section B: Pharmacist Attitudes/ (beliefs) Towards CAM products

| Statement                                                                                                          | 5 | 4 | 3 | 2 | 1 |
|--------------------------------------------------------------------------------------------------------------------|---|---|---|---|---|
| CAM products are effective                                                                                         |   |   |   |   |   |
| CAM products should be sold only in a pharmacies                                                                   |   |   |   |   |   |
| The use of CAM products should not be limited to patients who have failed traditional prescription therapy         |   |   |   |   |   |
| Providing information about CAM products is a pharmacist's professional responsibility                             |   |   |   |   |   |
| Information resources on CAM products are available and easily accessible to the pharmacist                        |   |   |   |   |   |
| Continuous education related to CAM products should be mandatory for pharmacists                                   |   |   |   |   |   |
| CAM products have less side effects than conventional medicines                                                    |   |   |   |   |   |
| CAM products available in the Lebanese market are well standardized and of good quality                            |   |   |   |   |   |
| The market for CAM products in Lebanon is well regulated                                                           |   |   |   |   |   |
| Media plays a positive role in educating consumers about safe use of CAM products available in the Lebanese market |   |   |   |   |   |
| <b>*Scale of 1-5 (5 = strongly agree, 4 = agree, 3 = neutral, 2 = disagree, 1 = strongly disagree)</b>             |   |   |   |   |   |

## Section C: Current practice of dispensing CAM products

This is a 5-scale question so mark with an (X) for the suitable answer:

**1 (always), 2 (often), 3 (sometimes), 4 (rarely), and 5 (no)**

1- Do you sell CAM products in your pharmacy?

1   2   3   4   5

2- Do you get inquiries from patients regarding the use of CAM products?

1   2   3   4   5

3- Do you advise patients on safe use of CAM products?

1   2   3   4   5

4- Do you ask your patient about their feedback after their use of CAM products?

1   2   3   4   5

5- Do you report any toxic or undesirable effect occurred with patients using CAM products?

1   2   3   4   5

6- If yes, to whom do you report\_\_\_\_\_

7- Do you get referrals from natural practitioners to your pharmacy?

1   2   3   4   5

8- Do you check for CAM product-drug interaction?

1   2   3   4   5

## Sector D: Evaluation of knowledge related to CAM products

| <b>Statement</b>                                                           | <b>True</b> | <b>False</b> | <b>I don't know</b> |
|----------------------------------------------------------------------------|-------------|--------------|---------------------|
| Echinacea is commonly used for the treatment of cold & flu symptoms        |             |              |                     |
| Echinacea can be used in patients with autoimmune disorders                |             |              |                     |
| Ginseng may increase blood pressure                                        |             |              |                     |
| Valerian should be used cautiously in patients using benzodiazepines       |             |              |                     |
| Ginkgo can increase the risk of bleeding when combined with warfarin       |             |              |                     |
| Ginkgo can be used to delay dementia                                       |             |              |                     |
| Omega-3 is beneficial for patients suffering from cardiovascular disorders |             |              |                     |
| Omega-3 can be given safely to patient taking clopidogrel                  |             |              |                     |
| Vitamin B complex may delay wound healing                                  |             |              |                     |
| Vitamin C when taken with Iron (Ferrous salt) increases its absorption     |             |              |                     |
